# Supplementary material for: Hepatic microbiome in healthy lean and obese humans
Source: PubMed Central journal article supplement (PMC8207208; doi:10.1016/j.jhepr.2021.100299), 2021-04-27
Supplement: mmc2.pdf [file mmc2.pdf]

## JHEP Reports

### CTAT methods

Tables for a “Complete, Transparent, Accurate and Timely account” (CTAT) are now mandatory for all revised submissions. The aim is to enhance the reproducibility of methods.

- Only include the parts relevant to your study
- Refer to the CTAT in the main text as ‘Supplementary CTAT Table’
- Do not add subheadings
- Add as many rows as needed to include all information
- Only include one item per row

**If the CTAT form is not relevant to your study, please outline the reasons why:**

|  |
|--|
|  |
|--|

#### 1.1 Antibodies

| Name | Citation | Supplier | Cat no. | Clone no. |
|------|----------|----------|---------|-----------|
|      |          |          |         |           |

#### 1.2 Cell lines

| Name | Citation | Supplier | Cat no. | Passage no. | Authentication test method |
|------|----------|----------|---------|-------------|----------------------------|
|      |          |          |         |             |                            |

#### 1.3 Organisms

| Name | Citation | Supplier | Strain | Sex | Age | Overall n number |
|------|----------|----------|--------|-----|-----|------------------|
|      |          |          |        |     |     |                  |

#### 1.4 Sequence based reagents

| Name               | Sequence                         | Supplier |
|--------------------|----------------------------------|----------|
| 16S Primer forward | 5'-TCCTACGGGAGGCAGCAGT-3'        | N/A      |
| 16S Primer reverse | 5'-GGACTACCAGGGTATCTAATCCTGTT-3' | N/A      |

#### 1.5 Biological samples

| Description            | Source | Identifier |
|------------------------|--------|------------|
| Liver biopsy specimens | Human  |            |

#### 1.6 Deposited data

| Name of repository | Identifier | Link |
|--------------------|------------|------|
|                    |            |      |

## 1.7 Software

| Software name  | Manufacturer                                                                        | Version   |
|----------------|-------------------------------------------------------------------------------------|-----------|
| R              | R software                                                                          | 3.5.2     |
| GraphPad Prism | GraphPad Software                                                                   | 8.0.0     |
| FROGS          | N/A                                                                                 | 1.40 beta |
| vsearch        | N/A                                                                                 | 1.9.5     |
| swarm          | N/A                                                                                 | 2.1.6     |
| Blast+         | N/A                                                                                 | 2.2.30    |
| PhyloSeq       | N/A                                                                                 | 1.14.0    |
| Databank Silva | Max Planck Institute for Marine Microbiology and Jacobs University, Bremen, Germany | 128 Parc  |

## 1.8 Other (e.g. drugs, proteins, vectors etc.)

|  |  |  |
|--|--|--|
|  |  |  |
|  |  |  |

## 1.9 Please provide the details of the corresponding methods author for the manuscript:

**Malte Palm Suppli**  
 Gentofte Hospital  
 Gentofte Hospitalsvej 7, 3rd floor  
 2900 Hellerup, Denmark  
  
 e-mail: malte.palm.suppli@regionh.dk  
 phone: +45 25151436

## 2.0 Please confirm for randomised controlled trials all versions of the clinical protocol are included in the submission. These will be published online as supplementary information.

|  |
|--|
|  |
|--|
